# Supplementary material
Source: publisher figshare collection journal article supplement (https://acs.figshare.com/ndownloader/files/26132550)
Supplement: Supplementary file 1 [file 26132550]

# Supporting Information

## Engineering the Oxidative Potency of Non-Heme Iron(IV) Oxo Complexes in Water for C–H Oxidation by a cis Donor and Variation of the Second Coordination Sphere

Christina Wegeberg,<sup>a,b,†</sup> Mathias L. Skavenborg,<sup>a,c</sup> Andrea Liberato,<sup>d</sup> James N. McPherson,<sup>a</sup> Wesley R. Browne,<sup>b</sup> Erik D. Hedegård<sup>e</sup> and Christine J. McKenzie<sup>a,\*</sup>

<sup>a</sup>Department of Physics, Chemistry and Pharmacy, University of Southern Denmark, Campusvej 55, 5230 Odense M (Denmark). Email: [mckenzie@sdu.dk](mailto:mckenzie@sdu.dk)

<sup>b</sup>Molecular Inorganic Chemistry, Stratingh Institute for Chemistry, University of Groningen, Nijenborgh 4, 9747 AG Groningen (The Netherlands)

<sup>c</sup>Water Research Centre, School of Civil and Environmental Engineering, University of New South Wales, Sydney, NSW (Australia)

<sup>d</sup>Universidad de Cádiz, Facultad de Ciencias, Departamento de Ciencia de los Materiales e Ingeniería Metalúrgica y Química Inorgánica, Puerto Real, Cádiz 11510 (Spain)

<sup>e</sup>Division of Theoretical Chemistry, Lund University, Naturvetarvägen 14, 221 00 Lund (Sweden)

<sup>†</sup> Present address: Department of Chemistry, University of Basel, St. Johannis-Ring 19, 4056 Basel (Switzerland)

|                       |                                                                                                                                          |     |
|-----------------------|------------------------------------------------------------------------------------------------------------------------------------------|-----|
|                       | Instrumentation and Methods                                                                                                              | S2  |
|                       | Computational Details                                                                                                                    | S3  |
|                       | Materials and Preparation                                                                                                                | S4  |
| <b>Tables S1 – S3</b> | Crystallographic data for [VO(tpen)](ClO <sub>4</sub> ) <sub>2</sub> and [VO(tpenOH)](PF <sub>6</sub> ) <sub>2</sub>                     | S5  |
| <b>Table S4</b>       | DFT calculated relative Gibbs free energies of tpenO-based iron(IV)oxo complexes                                                         | S7  |
| <b>Table S5</b>       | DFT calculated relative Gibbs free energies of tpena-based iron(IV)oxo complexes                                                         | S8  |
| <b>Figure S1</b>      | NMR study of [Fe <sub>2</sub> O(Htpena) <sub>2</sub> ](ClO <sub>4</sub> ) <sub>4</sub> dissolved in D <sub>2</sub> O with NaOCl addition | S9  |
| <b>Figure S2</b>      | Raman spectra of iron(IV)oxo complexes                                                                                                   | S10 |
| <b>Figures S3 –S9</b> | Reactivity Studies towards C-H bonds                                                                                                     | S11 |
| <b>Figure S10</b>     | ESI-MS spectra series of [FeCl(tpenOH)] <sup>+</sup> undergoing oxidation                                                                | S17 |
|                       | References                                                                                                                               | S18 |

## Instrumentation and Methods

All experiments were carried out at room temperature. UV/Vis spectra were recorded in 1 cm quartz cuvettes on an Agilent 8453 spectrophotometer. IR spectra were recorded in the solid state (FT-ATR diamond anvil) on a Spectrum 65 FT-IR spectrometer (PerkinElmer). Raman spectra were recorded at 785 nm with one of the following: a RamanStation (Perkin Elmer) equipped with a BX51 upright microscope (80 mW at sample), a RamanFlex (Perkin Elmer) equipped with an Inphotonics industrial probe or a free space laser (75 mW, Ondax, with a 785 nm laser line clean up filter) and collected in back scattering ( $180^\circ$ ) mode with a Semrock dichroic beamsplitter and a 25 mm diameter/7.5 cm planoconvex lens to focus the laser on the sample and collect the Raman scattering. The Raman scattering was passed through a long pass filter (Semrock) and focused into a Shamrock300 spectrograph (ANDOR technology) and dispersed onto a iDUS-420-BUEX2 CCD camera. Spectra were calibrated with MeCN/toluene (50:50 v/v).  $^1\text{H}$  NMR spectra were recorded on a Bruker Avance III 400 spectrometer at ambient temperature. Chemical shifts are denoted relative to the residual solvent peak of  $\text{D}_2\text{O}$  ( $\delta = 4.79$  ppm). ESI-MS spectra were performed on a nanospray Bruker micro-OTOF-Q II spectrometer in positive-ionization mode. The aqueous iron solutions (1 mg/1mL) were diluted to 10  $\mu\text{g}/\text{mL}$  with MeCN before injection. The software mMass (version 5.4.1.0) was employed for the visualization and handling of the spectra. Elementary analysis (C, H, N) was performed on a FlashEA 1112. Reactivity studies were performed on 1.2 mL aqueous solutions of 1.5 mM [Fe] solutions at 22  $^\circ\text{C}$  with vigorous stirring to ensure proper mixing of the aqueous solutions and the miscible substrates. The pseudo-first order decay curves were obtained by monitoring the decrease in absorbance of the iron(IV)oxo species,  $\lambda_{\text{max}}$ , over time upon different concentrations of substrate were added (in the range of 0.1 M – 1.0 M). These profiles were fitted with an exponential decay function using OriginPro 9.0 to obtain the rate constants,  $k_{\text{obs}}$ .  $k_{\text{obs}}$  values were plotted against the concentrations of substrate, and their slopes (linear regression) represent the second-order rate constants ( $k_2$ ). Product analysis upon complete decay of  $\lambda_{\text{max}}$  monitored by UV/Vis spectroscopy was performed on a Hewlett Packard 6890 Series gas chromatograph system with a flame ionization detector. X-ray crystal diffraction data for  $[\text{VO}(\text{tpen})](\text{ClO}_4)_2$  and  $[\text{V}^{\text{IV}}\text{O}(\text{tpenOH})](\text{PF}_6)_2$  were collected at 100(2)K on a Synergy, Dualflex, AtlasS2 diffractometer using  $\text{CuK}\alpha$  radiation ( $\lambda = 1.54184 \text{ \AA}$ ) and the CrysAlis PRO 1.171.38.43 suite. The structures were solved by dual space methods (SHELXT) and refined on  $F^2$  using all the reflections (SHELXL-2016/2018). For  $[\text{VO}(\text{tpen})](\text{ClO}_4)_2$  all the non-hydrogen atoms were refined using anisotropic atomic displacement parameters and hydrogen atoms were inserted at calculated positions using a riding model. For the structure of  $[\text{V}^{\text{IV}}\text{O}(\text{tpenOH})](\text{PF}_6)_2$  there is significant disorder of one of the  $\text{PF}_6^-$  counter anions (P2, F7, F8, F9, F10, F11 and F12) and the ethanol arm (C21, C22, O2). Thus the atoms were modelled over two positions. All other non-hydrogen atoms were refined using anisotropic atomic displacement parameters, and hydrogen atoms were inserted at calculated positions using a riding model, including the alcohol H atom. CCDC 1971388 and 2017382 contain the supplementary crystallographic data for this paper.

## Computational Details

All calculations were carried out with the Gaussian 16 program<sup>1</sup> employing density functional theory (DFT) in the unrestricted Kohn-Sham formulation. We employed the generalized gradient approximation (GGA) hybrid B3LYP<sup>2-4</sup> functional and the (non-hybrid) *meta*-GGA functional TPSS.<sup>5</sup> All calculations were done with the def2-TZVPP basis set.<sup>6,7</sup> All energies are reported from optimized structures at the same level of theory. In addition, harmonic frequencies were calculated to obtain thermochemical corrections (using a temperature of 25° C). All calculations were carried out with polarizable continuum model (PCM)<sup>8</sup> to mimic the water solvent (using default input parameters).

The hybrid functional B3LYP is known to be biased towards high-spin states, and the non-hybrid functional TPSS to be bias towards low-spin states.<sup>9</sup> The two functionals provide large differences in spin state splittings, but in most cases agrees on that the  $S = 1$  state is the most stable (table S4 and S5). The only exception is  $[\text{Fe}^{\text{IV}}\text{O}(\text{HtpenO})]^{2+}$ , where B3LYP yields  $S = 2$  and TPSS yields the  $S = 1$  spin state as most stable. In the case of  $[\text{Fe}^{\text{IV}}\text{O}(\text{Htpena})]^{2+}$  the  $S = 1$  state calculated is in agreement with previously obtained Mössbauer parameters ( $\delta = 0.00 \text{ cm}^{-1}$ ,  $\Delta E_Q = 0.90 \text{ cm}^{-1}$ ).<sup>10</sup>

## Materials and Preparation

The complexes  $[\text{FeCl}(\text{tpenOH})](\text{PF}_6)$ ,  $[\text{FeCl}(\text{ettpen})](\text{PF}_6)$ ,  $[\text{Fe}_2\text{O}(\text{Htpena})](\text{ClO}_4)_4$ ,  $[\text{FeCl}(\text{bztpen})](\text{PF}_6)$ ,  $[\text{Fe}(\text{tpen})](\text{PF}_6)_2$ , and  $[\text{FeCl}(\text{metpen})](\text{PF}_6)$  were synthesized as previously reported.<sup>11–15</sup> CAN, NaClO (14 %, aq.) and substrates were purchased from commercial suppliers and used without further purification. The aqueous solutions were either prepared from demineralised water or  $^{18}\text{O}$ - $\text{H}_2\text{O}$  (supplied by Rotem Industries Ltd.).

*Perchlorate salts of metal complexes are potentially explosive and should be handled with caution in small quantities.*

### $[\text{V}^{\text{IV}}\text{O}(\text{tpen})](\text{ClO}_4)_2$

$\text{VO}(\text{ClO}_4)_2$  (29.5 mg, 0.115 mmol) was dissolved in MeOH:MeCN (2:1, 3 ml) by heating under reflux. tpen (51.4 mg, 0.121 mmol) and  $\text{NaClO}_4$  (34 mg, 0.278 mmol) dissolved in MeOH (2 ml) were added, and the reaction mixture was refluxed for additional 5 minutes. Upon slow cooling a blue crystalline material precipitated, which was isolated by vacuum filtration and washed with MeOH to afford 41 mg (53 %) of  $[\text{VO}(\text{tpen})](\text{ClO}_4)_2$ . Anal. Calcd. (%) for  $\text{C}_{26}\text{H}_{28}\text{Cl}_2\text{N}_6\text{O}_9\text{V}$ ; C: 45.23, H: 4.09, N: 12.17. Found C: 44.90, H: 4.40, N: 11.90. ESI-MS (pos. mode, MeCN),  $m/z$  590.1282 (590.1244, 3%,  $[\text{V}^{\text{IV}}\text{O}(\text{tpen}) + \text{ClO}_4]^+$ ), 507.1713, (507.1746, 100%,  $[\text{V}^{\text{V}}(\text{O})(\text{O})(\text{tpen})]^+$ ), 245.5891 (245.5877, 22%,  $[\text{V}^{\text{IV}}\text{O}(\text{tpen})]^{2+}$ ). IR (FT-ATR diamond anvil)  $\nu_{\text{V=O}}$  986  $\text{cm}^{-1}$ .

### $[\text{V}^{\text{IV}}\text{O}(\text{tpenOH})](\text{PF}_6)_2$

$\text{VOSO}_4 \cdot 5\text{H}_2\text{O}$  (71 mg, 0.281 mmol), tpenOH (104 mg, 0.276 mmol) and  $\text{Et}_3\text{N}$  (67 mg, 37  $\mu\text{L}$ , 0.265 mmol) dissolved in  $\text{H}_2\text{O}$  (2.5 mL) were heated to boiling point.  $\text{KPF}_6$  (131 mg, 0.712 mmol) dissolved in MeOH (2 mL) was added to the hot solution and the reaction mixture was slowly cooled to r.t. to afford  $[\text{V}^{\text{IV}}\text{O}(\text{tpenOH})](\text{PF}_6)_2$  as green crystals suitable for x-ray crystallography. Yield: 186 mg (0.253 mmol, 92%). ESI-MS (pos. mode, MeOH),  $m/z$  443.1525 (443.1526, 100%,  $[\text{V}^{\text{IV}}\text{O}(\text{tpenO})]^+$ ). IR (FT-ATR diamond anvil)  $\nu_{\text{V=O}}$  986  $\text{cm}^{-1}$ .

## Generation of Iron(IV)oxo Species

The iron(IV)oxo complexes were generated from their iron(II)/iron(III) precursors when dissolved in water with addition of 3 eq. of either CAN or NaClO at rt. The formation of green-blue chromophores was monitored by following the increase in  $\lambda_{\text{max}}$  around 720 nm  $\pm$  10 nm in the UV/Vis spectrum. The ambient pH of the iron(II)/iron(III) solutions are 5. The pH of the solutions decreases to 2 upon addition of CAN (3 eq.) and increases to 7 upon addition of NaOCl (3 eq.). The lifetimes of all complexes are lowered when they are generated using ClO<sup>-</sup> compared to CAN.

**Table S1.** Crystallographic data for [VO(tpen)](ClO<sub>4</sub>)<sub>2</sub> and [VO(tpenOH)](PF<sub>6</sub>)<sub>2</sub>

| Complex                                                                                                                                                     | [VO(tpen)](ClO <sub>4</sub> ) <sub>2</sub>                                      | [VO(tpenOH)](PF <sub>6</sub> ) <sub>2</sub>                   |
|-------------------------------------------------------------------------------------------------------------------------------------------------------------|---------------------------------------------------------------------------------|---------------------------------------------------------------|
| Empirical formula                                                                                                                                           | C <sub>26</sub> H <sub>28</sub> Cl <sub>2</sub> N <sub>6</sub> O <sub>9</sub> V |                                                               |
| Formula weight (g/mol)                                                                                                                                      | 690.38                                                                          | 734.36                                                        |
| Temperature (K)                                                                                                                                             | 100(2)                                                                          | 100(2)                                                        |
| Crystal system                                                                                                                                              | Triclinic                                                                       | Monoclinic                                                    |
| Space group                                                                                                                                                 | <i>P</i> -1                                                                     | <i>P</i> 2 <sub>1</sub> / <i>n</i>                            |
| <i>a</i> , <i>b</i> , <i>c</i> (Å)                                                                                                                          | 9.3995(3), 10.6655(3), 14.3220(4)                                               | 10.0617 (1), 21.2223 (1), 12.9466 (1)                         |
| $\alpha$ , $\beta$ , $\gamma$ (°)                                                                                                                           | 92.544(2), 95.375(2), 100.541(3)                                                | 90, 90.121 (1), 90                                            |
| Volume (Å <sup>3</sup> )                                                                                                                                    | 1402.57(7)                                                                      | 2764.51 (4)                                                   |
| <i>Z</i>                                                                                                                                                    | 2                                                                               | 4                                                             |
| Radiation type                                                                                                                                              | Cu K $\alpha$                                                                   | Cu K $\alpha$                                                 |
| Calculated density (g cm <sup>-3</sup> )                                                                                                                    | 1.635                                                                           | 1.764                                                         |
| Abs. coefficient (mm <sup>-1</sup> )                                                                                                                        | 5.29                                                                            | 5.17                                                          |
| <i>F</i> (000)                                                                                                                                              | 710                                                                             | 1484                                                          |
| Crystal size (mm)                                                                                                                                           | 0.15 × 0.06 × 0.02                                                              | 0.17 × 0.10 × 0.06                                            |
| Colour                                                                                                                                                      | Blue                                                                            | Green                                                         |
| Habit                                                                                                                                                       | Needle                                                                          | Irregular                                                     |
| $\theta_{\min}$ , $\theta_{\max}$ (°)                                                                                                                       | 4.2, 76.6                                                                       | 4.0, 66.6                                                     |
| Index range                                                                                                                                                 | -11 ≤ <i>h</i> ≤ 9, -13 ≤ <i>k</i> ≤ 13, -17 ≤ <i>l</i> ≤ 15                    | -11 ≤ <i>h</i> ≤ 11, -25 ≤ <i>k</i> ≤ 25, -15 ≤ <i>l</i> ≤ 15 |
| Refns. collected / unique / with <i>I</i> > 2 $\sigma$ ( <i>I</i> )                                                                                         | 11413 / 5674 / 5337                                                             | 94011 / 4871 / 4710                                           |
| <i>R</i> <sub>int</sub>                                                                                                                                     | 0.020                                                                           | 0.040                                                         |
| Data / restraints / parameters                                                                                                                              | 5674 / 0 / 397                                                                  | 4871 / 574 / 463                                              |
| GOOF on <i>F</i> <sup>2</sup>                                                                                                                               | 1.04                                                                            | 1.03                                                          |
| Final <i>R</i> <sub>1</sub> ( <i>F</i> ) <sup>a</sup> / <i>wR</i> <sub>2</sub> ( <i>F</i> <sup>2</sup> ) <sup>b</sup> ( <i>I</i> > 2 $\sigma$ ( <i>I</i> )) | 0.033 / 0.0884                                                                  | 0.071 / 0.185                                                 |
| <i>R</i> <sub>1</sub> <sup>a</sup> / <i>wR</i> <sub>2</sub> ( <i>F</i> <sup>2</sup> ) <sup>b</sup> (all data)                                               | 0.036 / 0.0903                                                                  | 0.072 / 0.186                                                 |
| Largest diff. peak / hole (e Å <sup>-3</sup> )                                                                                                              | 0.69, -0.42                                                                     | 1.49, -0.92                                                   |

<sup>a</sup>  $R_1 = \sum ||F_{\text{obs}}| - |F_{\text{calc}}|| / \sum |F_{\text{obs}}|$ . <sup>b</sup>  $wR_2(F^2) = \{ \sum [w (F_{\text{obs}}^2 - F_{\text{calc}}^2)^2] / \sum [w (F_{\text{obs}}^2)^2] \}^{1/2}$ .

**Table S2. Selected bond distances and angles in [VO(tpen)](ClO<sub>4</sub>)<sub>2</sub>**

|       |             |          |            |
|-------|-------------|----------|------------|
| V1—O1 | 1.5943 (13) | O1—V1—N1 | 96.24 (6)  |
| V1—N1 | 2.0999 (15) | O1—V1—N2 | 102.76 (7) |
| V1—N2 | 2.0842 (15) | O1—V1—N3 | 173.25 (6) |
| V1—N3 | 2.2834 (15) | O1—V1—N4 | 98.31 (6)  |
| V1—N4 | 2.1122 (15) | O1—V1—N5 | 102.31 (6) |
| V1—N5 | 2.1553 (15) |          |            |

**Table S3. Selected bond distances and angles in [VO(tpenOH)](PF<sub>6</sub>)<sub>2</sub>**

|       |           |          |             |
|-------|-----------|----------|-------------|
| V1—O1 | 1.591 (3) | O1—V1—N1 | 95.32 (15)  |
| V1—N1 | 2.106 (4) | O1—V1—N2 | 101.34 (16) |
| V1—N2 | 2.092 (4) | O1—V1—N3 | 171.59 (15) |
| V1—N3 | 2.267 (4) | O1—V1—N4 | 99.81 (16)  |
| V1—N4 | 2.118 (4) | O1—V1—N5 | 101.80 (16) |
| V1—N5 | 2.138 (4) |          |             |

**Table S4:** Calculation of the stabilities of isomers of the Fe(IV)oxo complex of tpenOH/HtpenO. DFT calculated relative Gibbs free energies in kJ/mol. Both  $S = 1$  (T) and  $S = 2$  (Q) are have been calculated  $\Delta G_{Q-T}$  are given in parentheses).  $\Delta E_{Q-T}$  denotes the electronic spin-state splitting (including ZPVE) in kJ/mol. Fe=O is stretch frequencies in  $\text{cm}^{-1}$  (for  $S = 1$  with the  $S = 2$  in parentheses). The stretches with largest displacements of Fe and O atoms are underlined.

| Ligand | Func. | Most stable $S$ | $\Delta E_{Q-T}$ | $\Delta G$ ( $\Delta G_{Q-T}$ ) | $\nu$ (Fe=O)                                           | Structure                                                                           |
|--------|-------|-----------------|------------------|---------------------------------|--------------------------------------------------------|-------------------------------------------------------------------------------------|
| tpenOH | TPSS  | 1               | 81.6             | 0.0 (74.1)                      | <u>849</u> , <u>869</u><br>( <u>878</u> )              | 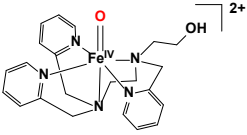 |
| tpenOH | B3LYP | 1               | 17.0             | 0.0 (9.2)                       | 876, <u>906</u><br>( <u>926</u> )                      |                                                                                     |
| HtpenO | TPSS  | 1               | 53.7             | 52.9 (45.9)                     | <u>835</u> , <u>837</u><br>( <u>849</u> , <u>867</u> ) |  |
| HtpenO | B3LYP | 2               | 0.2              | 53.6 (−3.9)                     | <u>866</u> , <u>884</u> ( <u>888</u> )                 |                                                                                     |

**Table S5:** Calculation of the stabilities of isomers of the Fe(IV)oxo complex of tpena/Htpena/tpenaH. DFT calculated relative Gibbs free energies in kJ/mol. Both  $S = 1$  (T) and  $S = 2$  (Q) are have been calculated ( $\Delta G_{Q-T}$  are given in parentheses).  $\Delta E_{Q-T}$  denotes the electronic spin-state splitting (including ZPVE) in kJ/mol. The stretch frequencies of Fe=O are given in  $\text{cm}^{-1}$  (for  $S = 1$  with  $S = 2$  in parentheses). The stretches with largest displacements of Fe and O atoms are underlined.

| Ligand       | Functional | Most stable $S$ | $\Delta E_{Q-T}$ | $\Delta G$ ( $\Delta G_{Q-T}$ ) | $\nu$ (Fe=O)                              | Structure |
|--------------|------------|-----------------|------------------|---------------------------------|-------------------------------------------|-----------|
| tpenaH       | TPSS       | 1               | 70.8             | 0 (62.6)                        | 847, <u>866</u> , 874 ( <u>873</u> )      |           |
| tpenaH       | B3LYP      | 1               | 17.0             | 0 (9.2)                         | 885, <u>907</u> (902, 921, 950)           |           |
| tpena        | TPSS       | 1               | 73.9             | 0 (64.9)                        | 847, <u>864</u> , 870 ( <u>872</u> )      |           |
| tpena        | B3LYP      | 1               | 19.8             | 0 (12.4)                        | 876, <u>904</u> (902, 916, 951)           |           |
| Htpena       | TPSS       | 1               | 59.8             | 18.4 (54.5)                     | <u>854</u> , <u>871</u> (864, 891)        |           |
| Htpena       | B3LYP      | 1               | 6.6              | 20.1 (2.4)                      | 881, <u>907</u> (893, 923)                |           |
| tpena        | TPSS       | 1               | 65.2             | -23.1 (58.0)                    | <u>858</u> , <u>868</u> (864, 890)        |           |
| tpena        | B3LYP      | 1               | 11.1             | -23.9 (4.7)                     | <u>905</u> (894, 924)                     |           |
| trans-Htpena | TPSS       | 1               | 39.1             | 46.5 (32.6)                     | <u>845</u> ( <u>860</u> )                 |           |
| trans-Htpena | B3LYP      | 2               | -15.0            | 30.9 (-21.3)                    | <u>891</u> ( <u>907</u> )                 |           |
| trans-tpenaH | TPSS       | 1               | 25.7             | 67.8 (23.7)                     | 831, <u>838</u> , 840, 853 ( <u>861</u> ) |           |
| trans-tpenaH | B3LYP      | 2               | -23.6            | 50.3 (-27.7)                    | 873, <u>887</u> ( <u>907</u> )            |           |

The energy differences between the tpena isomers are generally smaller than for the corresponding tpenOH complex; only 20.1 kJ/mol (B3LYP) or 18.4 kJ/mol (TPSS) between  $[\text{Fe}^{\text{IV}}\text{O}(\text{Htpena})]^{2+}$  and  $[\text{Fe}^{\text{IV}}\text{O}(\text{tpenaH})]^{2+}$ , with the fully N coordinated  $[\text{Fe}^{\text{IV}}\text{O}(\text{tpenaH})]^{2+}$  being most stable. For the deprotonated variant both functionals predict that the O coordinated structure is the most stable, but the energy difference is again small (23–24 kJ/mol). These results indicate that in contrast to the tpenOH complexes, both isomers can exist in solution. The additional DFT calculations for isomers of  $[\text{Fe}^{\text{IV}}\text{O}(\text{tpenaH})]^{2+}$  and  $[\text{Fe}^{\text{IV}}\text{O}(\text{Htpena})]^{2+}$  where the *trans* donor to the Fe=O moiety was changed from a tertiary amine to either a pyridyl or the carboxylate showed that the *trans*-tertiary amine always comes out as most stable (by 50–68 kJ/mol compared to *trans*-pyridine and 31–46 kJ/mol compared to *trans*-carboxy).



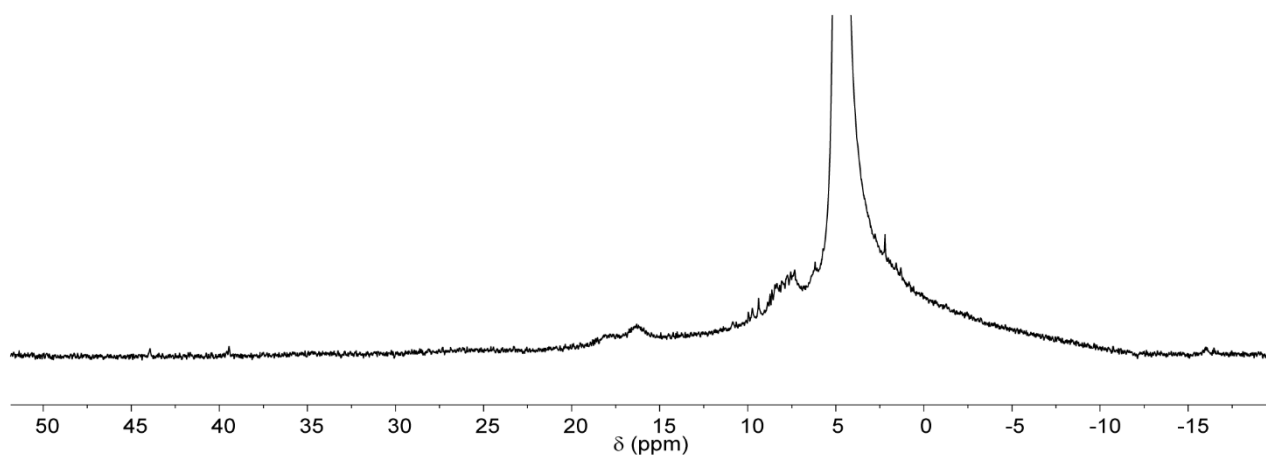

**Figure S1.**  $^1\text{H}$ -NMR (400 MHz) from 50 ppm to - 20 ppm of  $[\text{Fe}_2\text{O}(\text{Htpena})_2](\text{ClO}_4)_4$  dissolved in  $\text{D}_2\text{O}$  (1 mM) which has been oxidized with  $\text{NaClO}$  (6 eq.). The spectrum was acquired 30 minutes after  $\text{NaClO}$  addition.

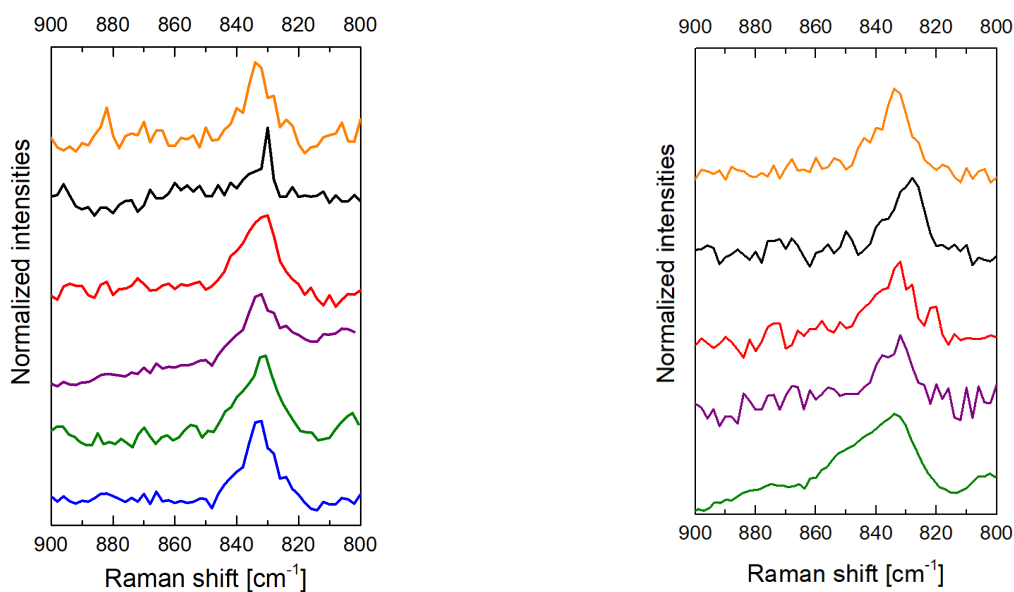

**Figure S2.** Raman spectra of  $[\text{Fe}^{\text{IV}}=\text{O}(\text{HtpenO})]^{2+}$  (blue,  $\lambda_{\text{max}}$  723 nm),  $[\text{Fe}^{\text{IV}}=\text{O}(\text{Htpena})]^{2+}$  (green,  $\lambda_{\text{max}}$  730 nm),  $[\text{Fe}^{\text{IV}}=\text{O}(\text{tpen})]^{2+}$  (purple,  $\lambda_{\text{max}}$  712 nm),  $[\text{Fe}^{\text{IV}}=\text{O}(\text{metpen})]^{2+}$  (red,  $\lambda_{\text{max}}$  714 nm),  $[\text{Fe}^{\text{IV}}=\text{O}(\text{bztpen})]^{2+}$  (black,  $\lambda_{\text{max}}$  722 nm) and  $[\text{Fe}^{\text{IV}}=\text{O}(\text{ettpen})]^{2+}$  (orange,  $\lambda_{\text{max}}$  718 nm) generated in  $\text{H}_2\text{O}$  from either 3 eq. CAN (left) or 3 eq.  $\text{NaOCl}$  (right) ( $[\text{Fe}] = 4$  mM,  $\lambda_{\text{exc}} = 785$  nm, rt).

## Reactivity Studies towards C-H Bonds

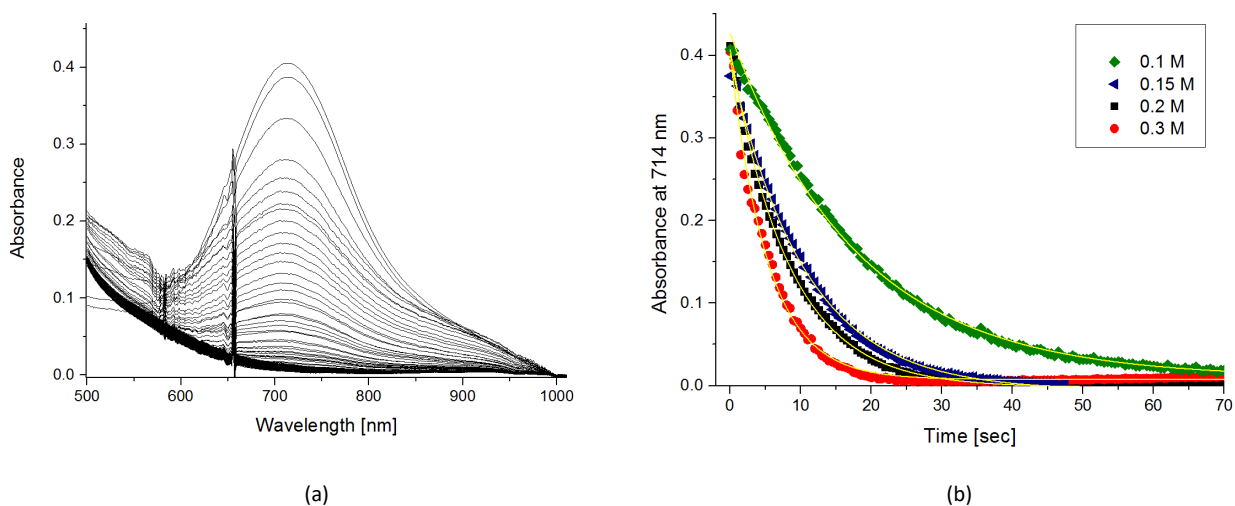

**Figure S3.** (a) Time-dependent UV/Vis of the decay of aqueous  $[\text{Fe}^{\text{IV}}\text{O}(\text{metpen})]^{2+}$  upon addition of benzyl alcohol and (b) time-trace of  $\lambda_{\text{max}}$  at 714 nm upon addition of four different concentrations of benzyl alcohol. The absorption-time decay profile is fitted to an exponential function shown in yellow to obtain  $k_{\text{obs}}$  values. pH = 2 (3. eq CAN),  $[\text{Fe}] = 1.5$  mM. Analogues analysis has been done for all complexes and substrates summarized in table 1 and table 2 in the manuscript.

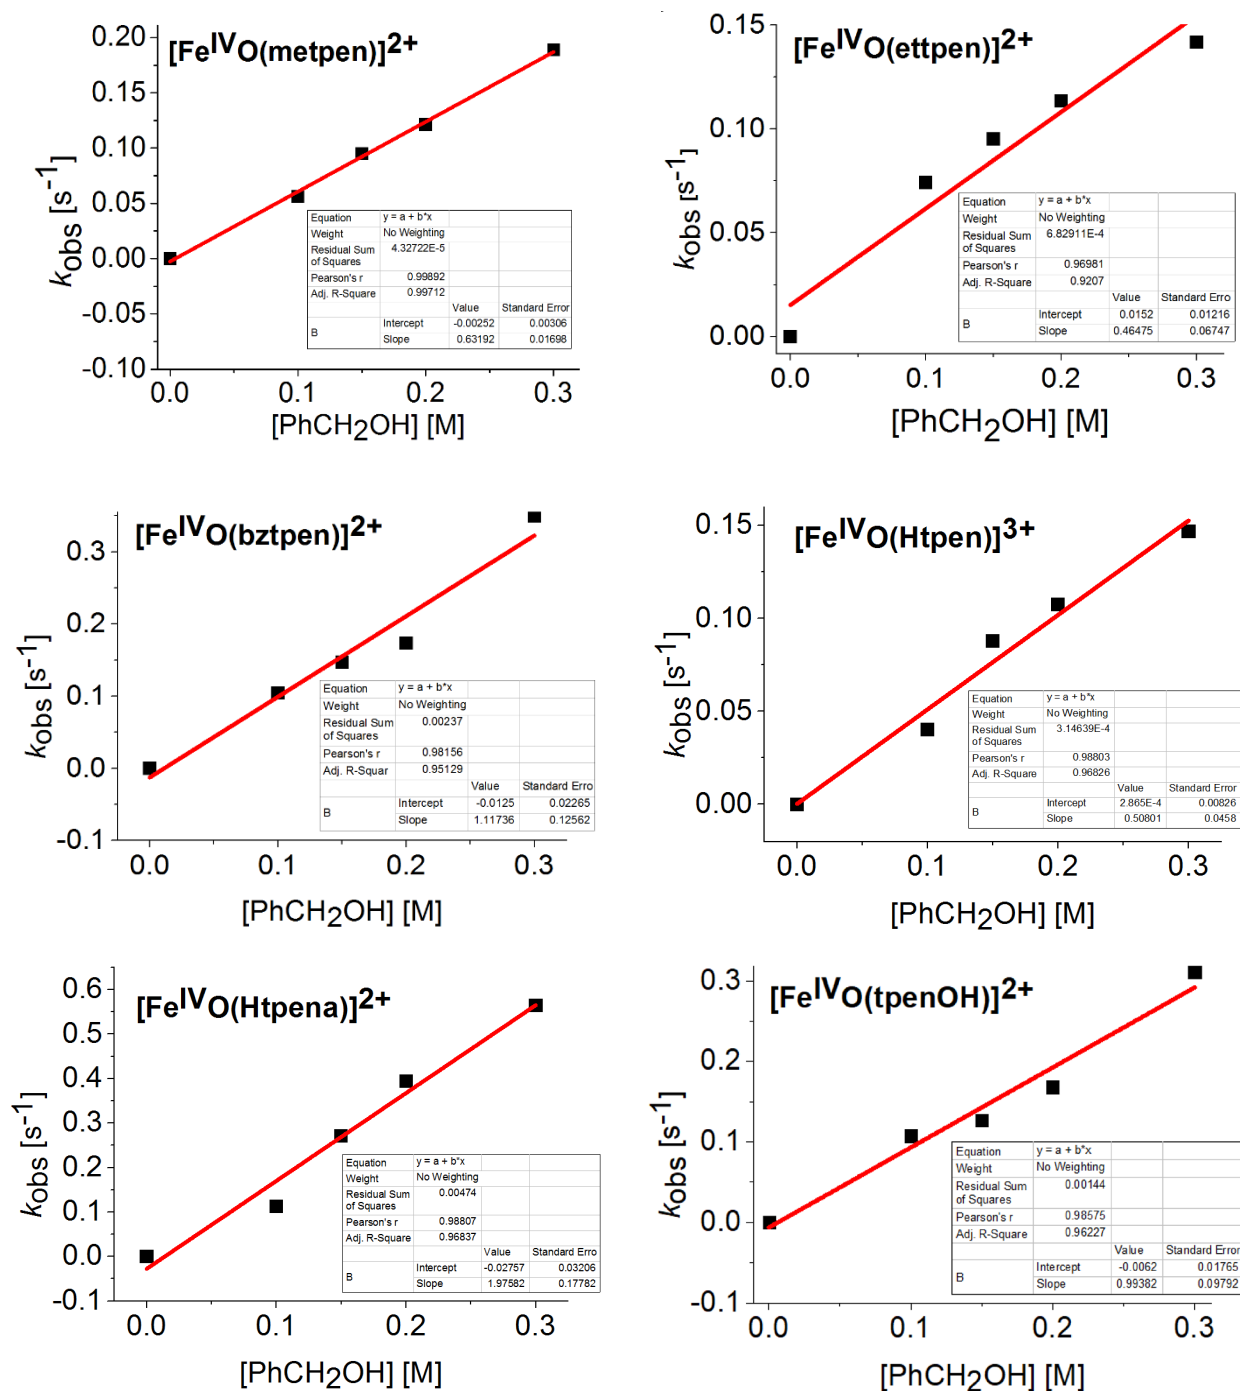

**Figure S4.** Second order rate constant plots ( $k_2$ ) where substrate concentrations of benzyl alcohol is plotted as a function of the pseudo-first-order rate constant,  $k_{obs}$ , for the series of six aqueous iron(IV)oxo species generated from addition of 3. eq. CAN. pH = 2, [Fe] = 1.5 mM, 22 °C. The fitted slopes in red represent  $k_2$ .

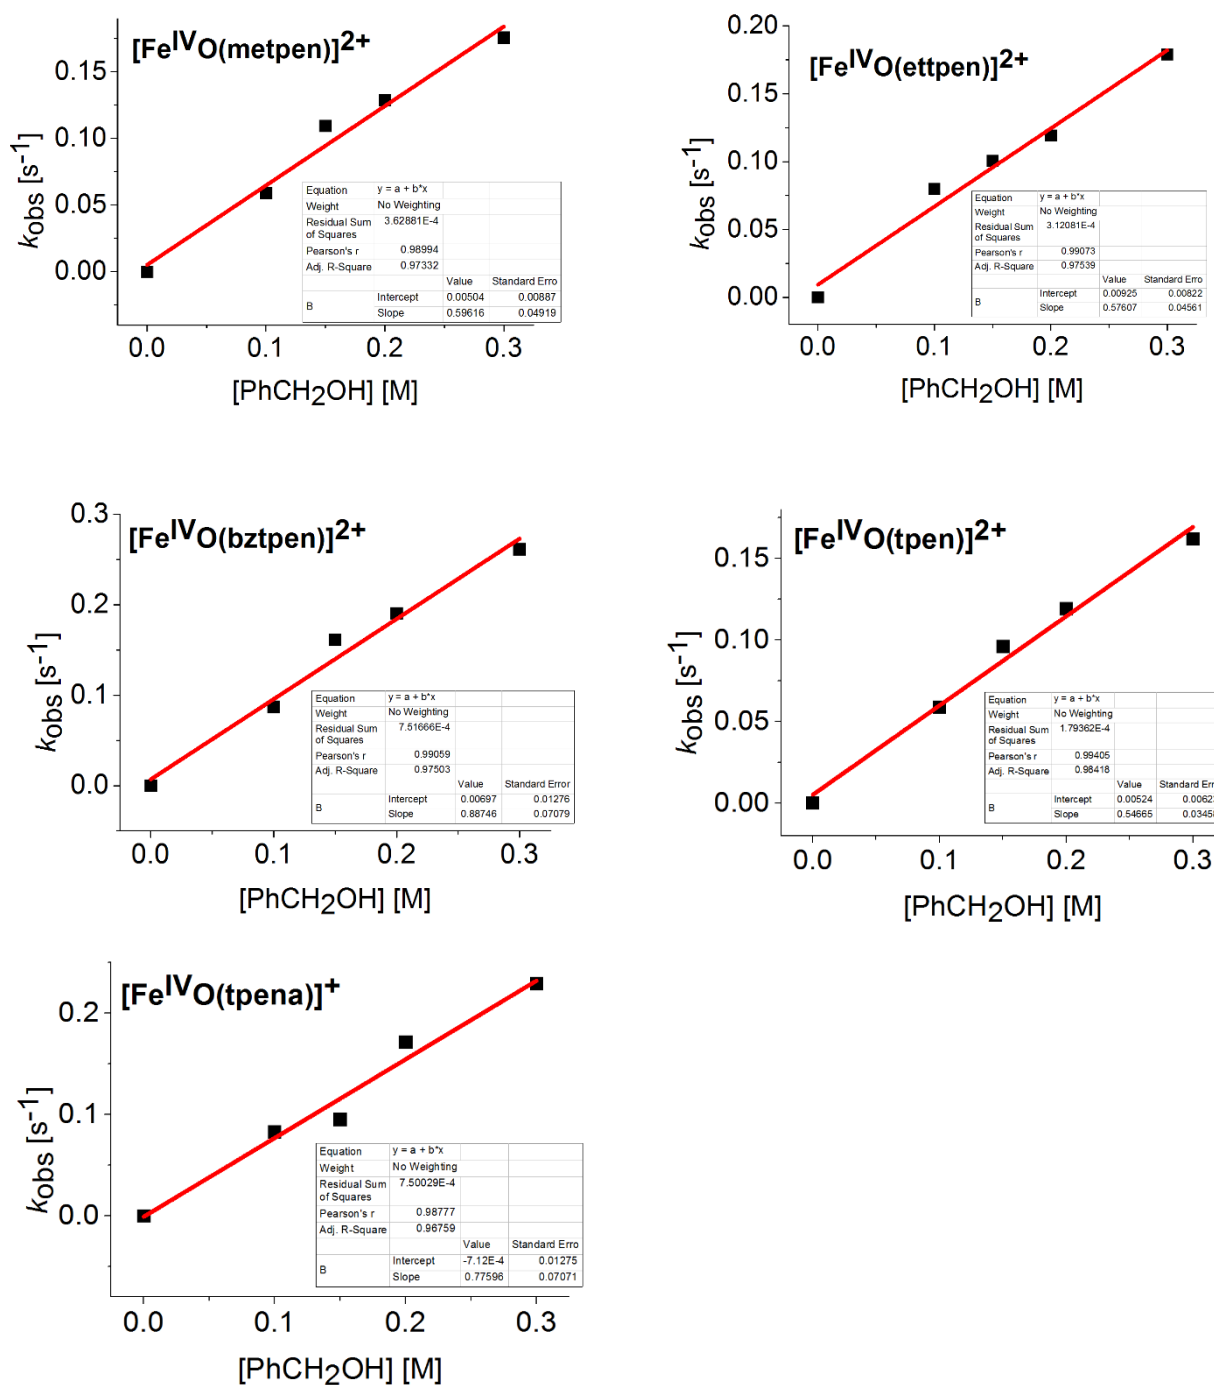

**Figure S5.** Second order rate constant plots ( $k_2$ ) where substrate concentrations of benzyl alcohol is plotted as a function of the pseudo-first-order rate constant,  $k_{\text{obs}}$ , for the series of six aqueous iron(IV)oxo species generated from addition of 3. eq. NaOCl. pH = 7, [Fe] = 1.5 mM, 22 °C. The fitted slopes in red represent  $k_2$ . A  $k_2$  value could not be obtained for [Fe<sup>IV</sup>O(tpenO)]<sup>+</sup> due to the rapid competing intramolecular oxidation of tpenO to tpna under these conditions.

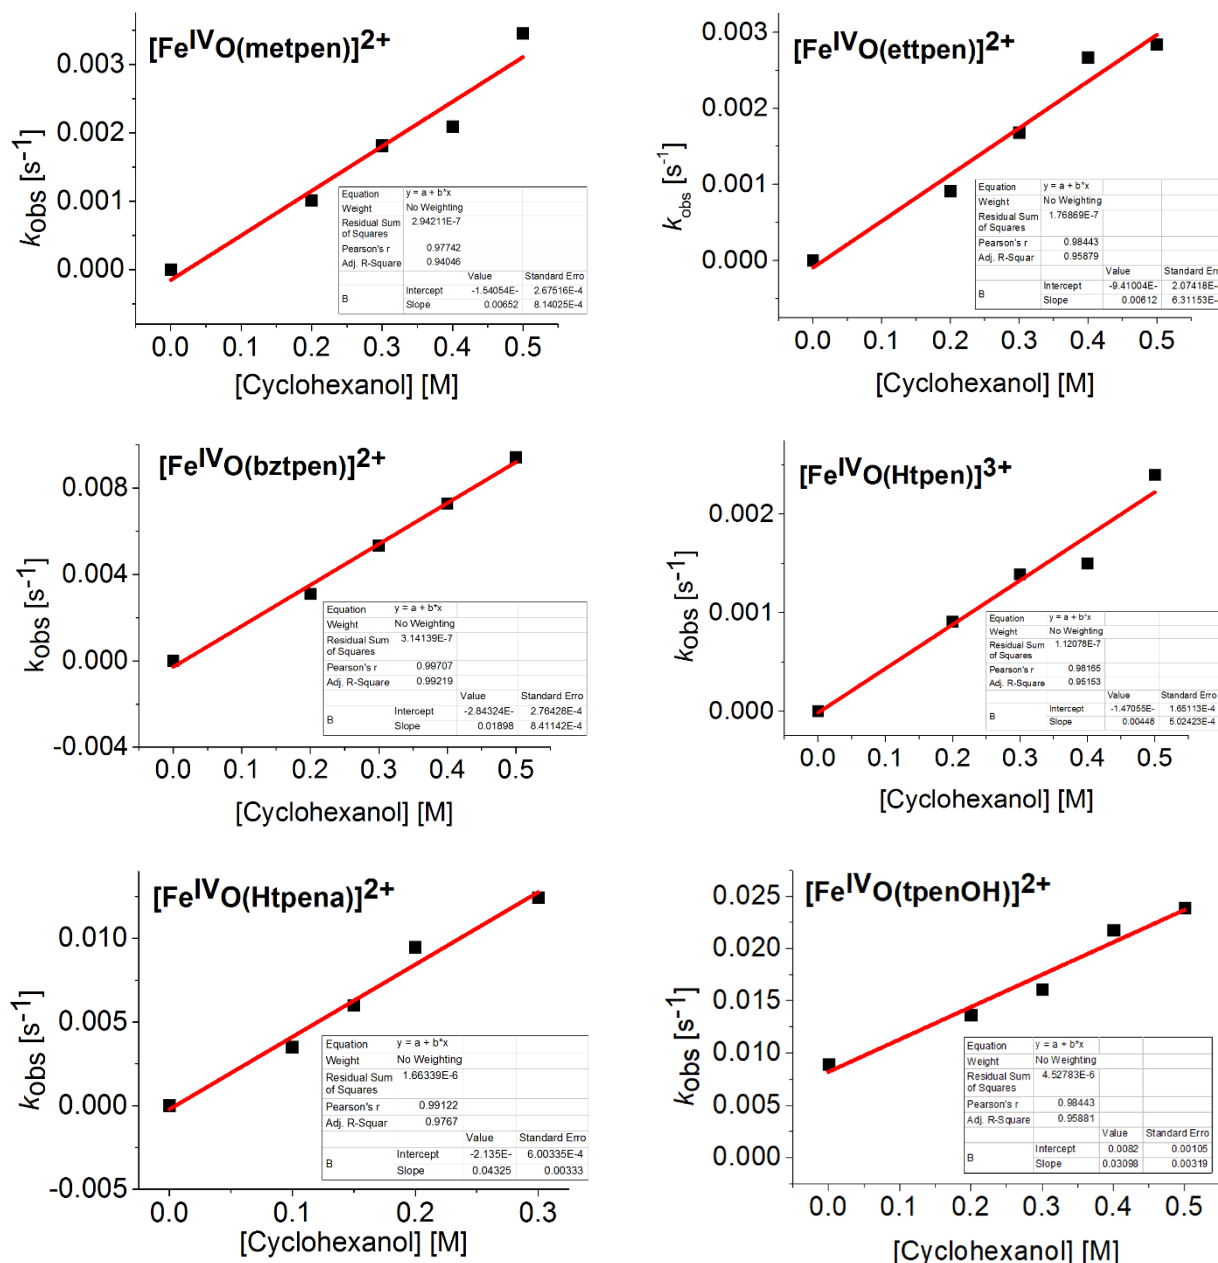

**Figure S6.** Second order rate constant plots ( $k_2$ ) where substrate concentrations of cyclohexanol is plotted as a function of the pseudo-first-order rate constant,  $k_{\text{obs}}$ , for the series of six aqueous iron(IV)oxo species generated from addition of 3. eq. CAN. pH = 2, [Fe] = 1.5 mM, 22 °C. The fitted slopes in red represent  $k_2$ .

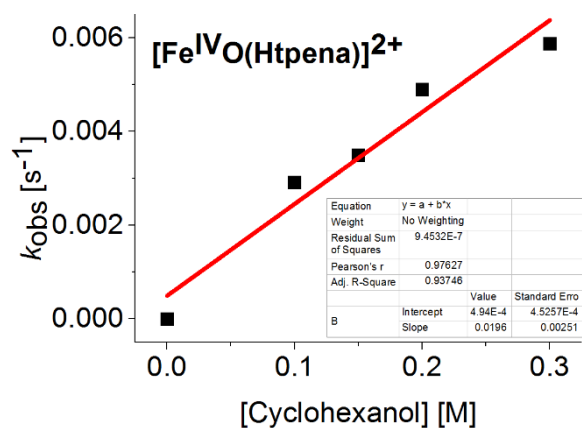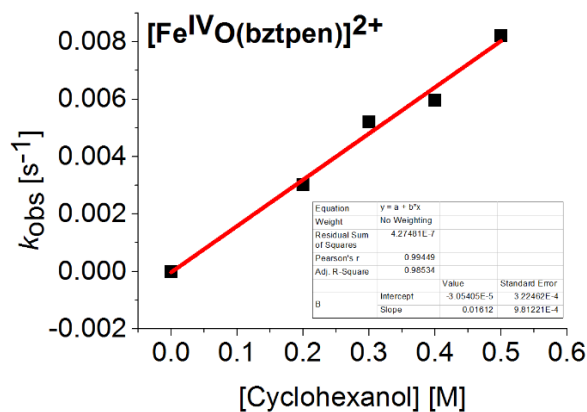

**Figure S7.** Second order rate constant plots ( $k_2$ ) where substrate concentrations of cyclohexanol is plotted as a function of the pseudo-first-order rate constant,  $k_{obs}$ , for [Fe<sup>IV</sup>O(tpena)]<sup>+</sup> and [Fe<sup>IV</sup>O(bztpen)]<sup>2+</sup> generated from addition of 3. eq. NaOCl. pH = 7, [Fe] = 1.5 mM, 22 °C. The fitted slopes in red represent  $k_2$ .

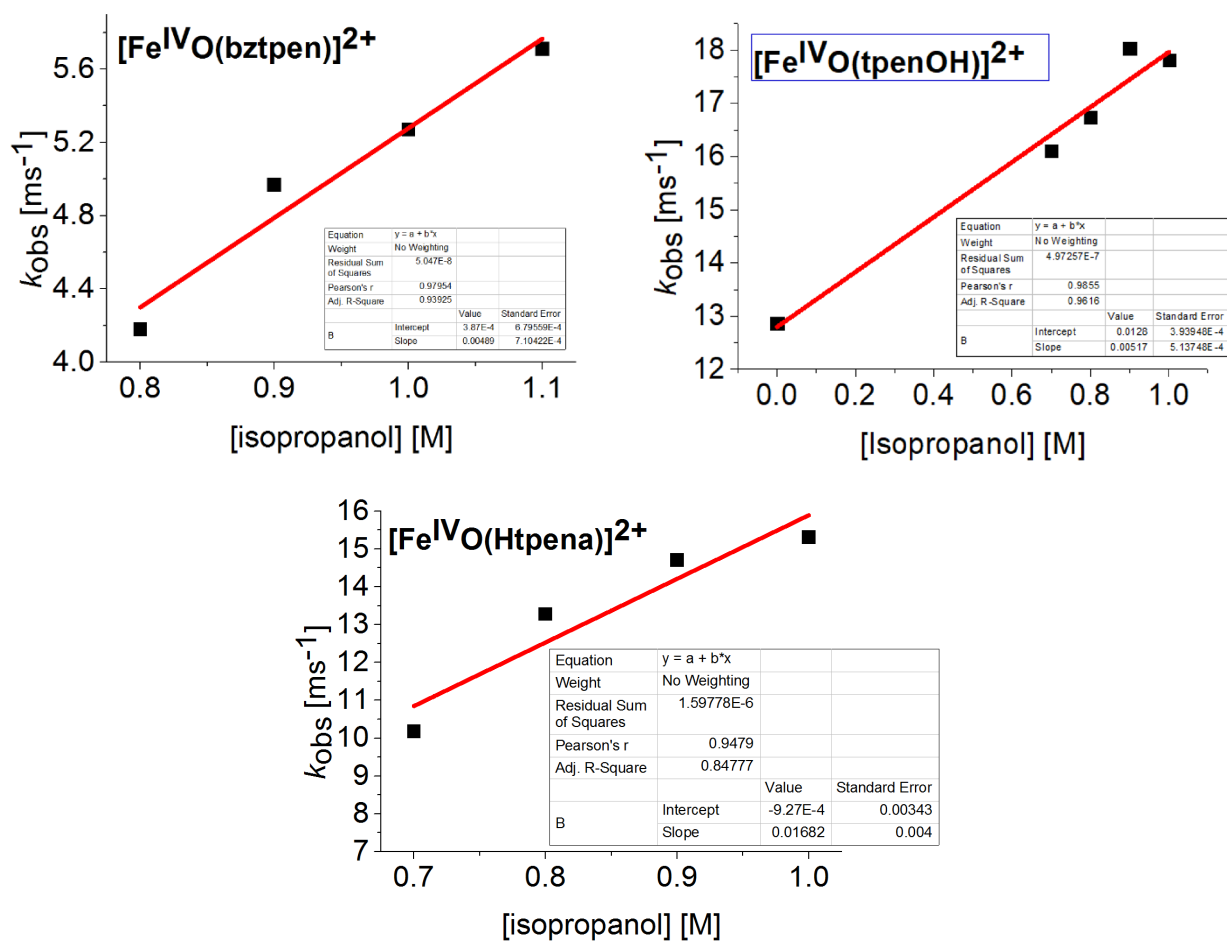

**Figure S8.** Second order rate constant plots ( $k_2$ ) where substrate concentrations of isopropanol is plotted as a function of the pseudo-first-order rate constant,  $k_{obs}$ , for [Fe<sup>IV</sup>O(bztpen)]<sup>2+</sup>, [Fe<sup>IV</sup>O(Htpena)]<sup>2+</sup> and [Fe<sup>IV</sup>O(HtpenO)]<sup>2+</sup> generated from addition of 3. eq. CAN. pH = 2, [Fe] = 1.5 mM, 22 °C. The fitted slopes in red represent  $k_2$ .

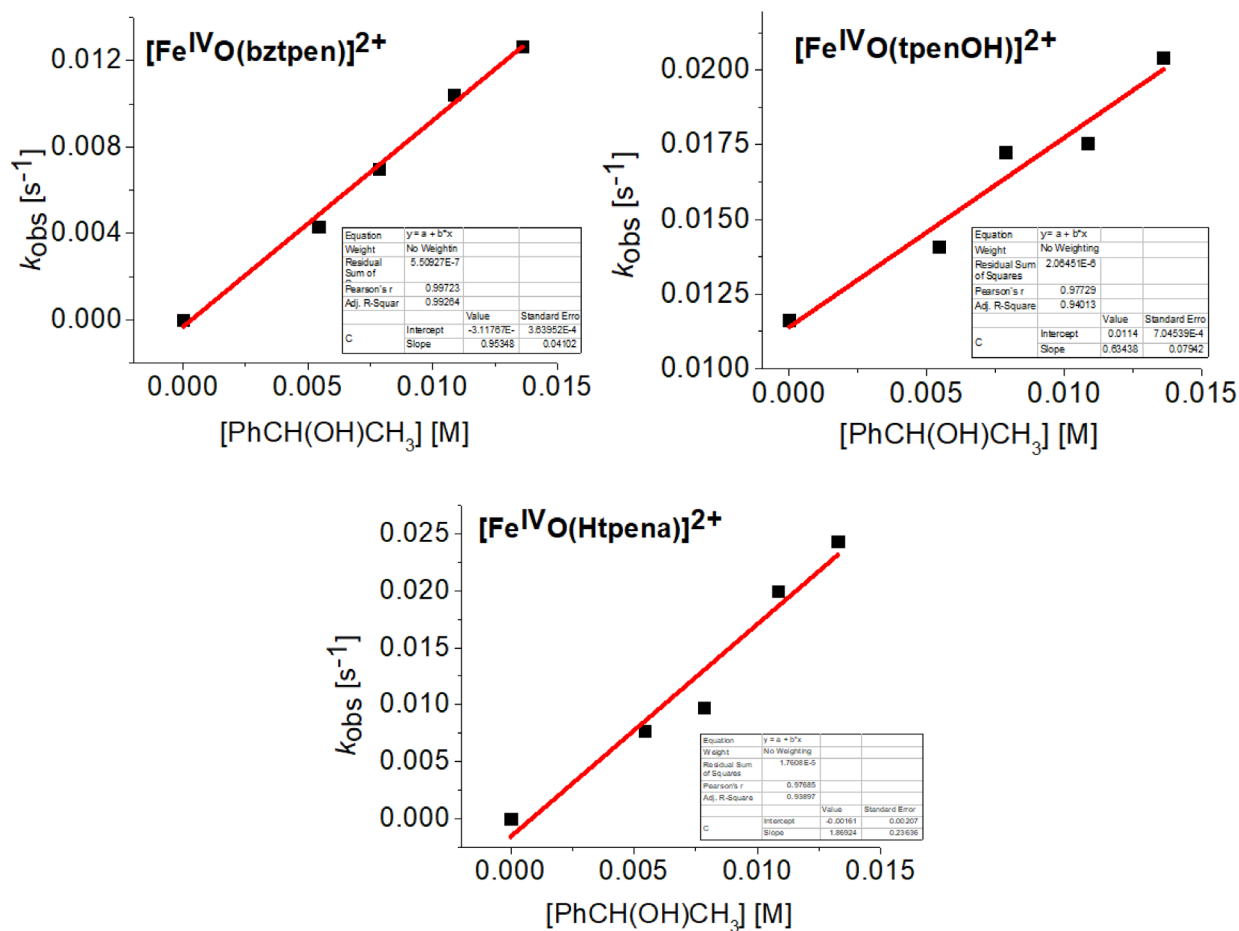

**Figure S9.** Second order rate constant plots ( $k_2$ ) where substrate concentrations of 1-phenylethanol is plotted as a function of the pseudo-first-order rate constant,  $k_{\text{obs}}$ , for  $[\text{Fe}^{\text{IV}}\text{O}(\text{bztpen})]^{2+}$ ,  $[\text{Fe}^{\text{IV}}\text{O}(\text{Htpena})]^{2+}$  and  $[\text{Fe}^{\text{IV}}\text{O}(\text{HtpenO})]^{2+}$  generated from addition of 3. eq. CAN. pH = 2,  $[\text{Fe}] = 0.75 \text{ mM}$ , 22 °C. The fitted slopes in red represent  $k_2$ .



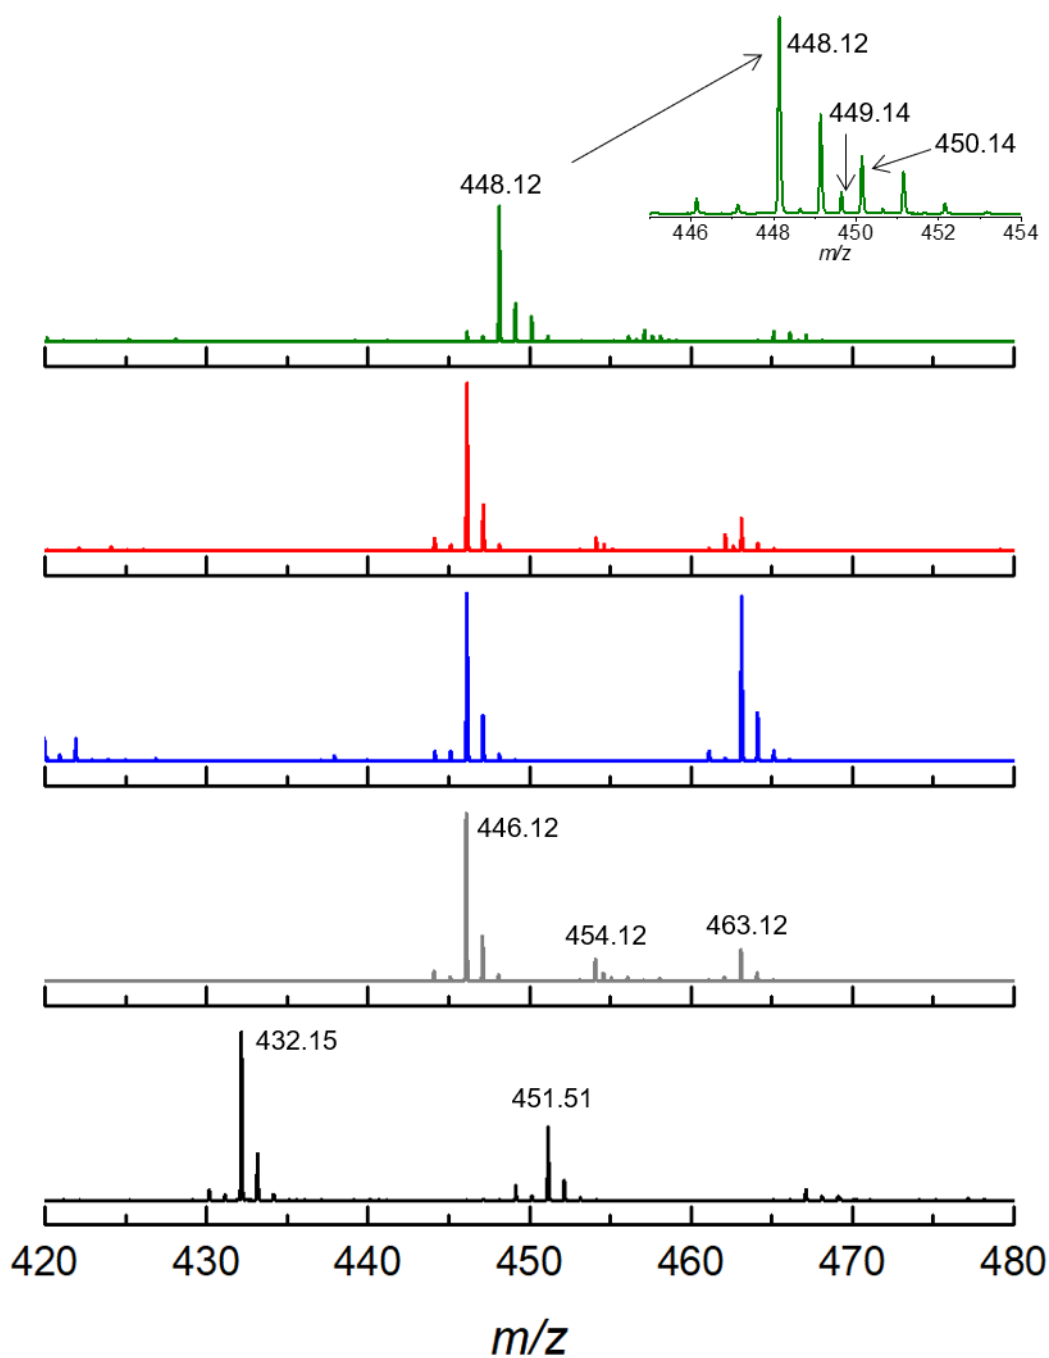

**Figure S10.** ESI-MS spectra of  $[\text{FeCl}(\text{tpenOH})](\text{PF}_6)$  in water (black), and after addition of 6 eq. CAN (blue), 3 eq.  $\text{ClO}^-$  (red) or 3 eq.  $\text{Cl}^{18}\text{O}^-$  (green).  $[\text{Fe}_2\text{O}(\text{tpenAH})_2](\text{ClO}_4)_4$  dissolved in water is shown in grey. Assignments:  $m/z$  463.12,  $[\text{Fe}^{\text{III}}\text{OH}(\text{tpena})]^+$ ; 454.12,  $[\text{Fe}_2^{\text{III}}\text{O}(\text{tpena})_2]^{2+}$ ; 451.15,  $[\text{Fe}^{\text{III}}\text{F}(\text{tpenO})]^+$ ; 448.12,  $^{18}\text{O}-[\text{Fe}^{\text{II}}(\text{tpena})]^+$ ; 446.12,  $[\text{Fe}^{\text{II}}(\text{tpena})]^+$ ; 432.15,  $[\text{Fe}^{\text{II}}(\text{tpenO})]^+$ . Insert: Zoom of  $m/z$  448.12 showing the isotopes  $m/z$  450.14 ( $^{18}\text{O}^{18}\text{O}-[\text{Fe}^{\text{II}}(\text{tpena})]^+$ ) and 449.14 ( $\{^{16}\text{O}-[\text{Fe}^{\text{II}}(\text{tpena})] + ^{18}\text{O}-[\text{Fe}^{\text{II}}(\text{tpena})]\}^{2+}$ ).

## References

- (1) Frisch, M. J.; Trucks, G. W.; Schlegel, H. B.; Scuseria, G. E.; Robb, M. A.; Cheeseman, J. R.; Scalmani, G.; Barone, V.; Petersson, G. A.; Nakatsuji, H.; Li, X.; Caricato, M.; Marenich, A. V.; Bloino, J.; Janesko, B. G.; Gomperts, R.; Mennucci, B.; Hratchian, H. P.; Ortiz, J. V.; Izmaylov, A. F.; Sonnenberg, J. L.; Williams-Young, D.; Ding, F.; Lipparini, F.; Egidi, F.; Goings, J.; Peng, B.; Petrone, A.; Henderson, T.; Ranasinghe, D.; Zakrzewski, V. G.; Gao, J.; Rega, N.; Zheng, G.; Liang, W.; Hada, M.; Ehara, M.; Toyota, K.; Fukuda, R.; Hasegawa, J.; Ishida, M.; Nakajima, T.; Honda, Y.; Kitao, O.; Nakai, H.; Vreven, T.; Throssell, K.; Montgomery, Jr., J. A.; Peralta, J. E.; Ogliaro, F.; Bearpark, M. J.; Heyd, J. J.; Brothers, E. N.; Kudin, K. N.; Staroverov, V. N.; Keith, T. A.; Kobayashi, R.; Normand, J.; Raghavachari, K.; Rendell, A. P.; Burant, J. C.; Iyengar, S. S.; Tomasi, J.; Cossi, M.; Millam, J. M.; Klene, M.; Adamo, C.; Cammi, R.; Ochterski, J. W.; Martin, R. L.; Morokuma, K.; Farkas, O.; Foresman, J. B.; Fox, D. J. *Gaussian 16*; Gaussian, Inc., Wallingford CT, 2016.
- (2) Becke, A. D. Density-functional Thermochemistry. III. The Role of Exact Exchange. *J. Chem. Phys.* **1993**, *98*, 5648.
- (3) Lee, C.; Yang, W.; Parr, R. G. Development of the Colle-Salvetti Correlation-energy Formula into a Functional of the Electron Density. *Phys. Rev. B, Condens. Matter* **1988**, *37*, 785–789.
- (4) Vosko, S. H.; Wilk, L.; Nusair, M. Accurate Spin-dependent Electron Liquid Correlation Energies for Local Spin Density Calculations: a Critical Analysis. *Can J Phys* **1980**, *58*, 1200–1211.
- (5) Tao, J.; Perdew, J. P.; Staroverov, V. N.; Scuseria, G. E. Climbing the Density Functional Ladder: Nonempirical Meta-generalized Gradient Approximation Designed for Molecules and Solids. *Phys. Rev. Lett.* **2003**, *91*, 146401.
- (6) Weigend, F.; Ahlrichs, R. Balanced Basis Sets of Split Valence, Triple Zeta Valence and Quadruple Zeta Valence Quality for H to Rn: Design and Assessment of Accuracy. *Phys. Chem. Chem. Phys.* **2005**, *7*, 3297–3305.
- (7) Weigend, F. Accurate Coulomb-fitting Basis Sets for H to Rn. *Phys. Chem. Chem. Phys.* **2006**, *8*, 1057–1065.
- (8) Tomasi, J.; Mennucci, B.; Cammi, R. Quantum Mechanical Continuum Solvation Models. *Chem. Rev.* **2005**, *105*, 2999–3093.
- (9) Swart, M.; Gruden, M. Spinning Around in Transition-Metal Chemistry. *Acc. Chem. Res.* **2016**, *49*, 2690–2697.

- (10) Vad, M. S.; Lennartson, A.; Nielsen, A.; Harmer, J.; McGrady, J. E.; Frandsen, C.; Mørup, S.; McKenzie, C. J. An Aqueous Non-heme Fe(IV)oxo Complex with a Basic Group in the Second Coordination Sphere. *Chem. Commun.* **2012**, 48, 10880–10882.
- (11) Bernal, I.; Jensen, I. M.; Jensen, K. B.; McKenzie, C. J.; Toftlund, H.; Tuchagues, J.-P. Iron(II ) Complexes of Polydentate Aminopyridyl Ligands and an Exchangeable Sixth Ligand; Reactions with Peroxides. Crystal Structure of  $[\text{FeL}^1 (\text{H}_2 \text{O})][\text{PF}_6]_2 \cdot \text{H}_2 \text{O}$  [ $\text{L}^1 = \text{N}, \text{N}'\text{-bis-(6-methyl-2-pyridylmethyl)-N}, \text{N}'\text{-bis(2-pyridylmethyl)ethane-1,2-diamine}$ ]. *J. Chem. Soc., Dalton Trans.* **1995**, 3667–3675.
- (12) Chang, H. R.; McCusker, J. K.; Toftlund, H.; Wilson, S. R.; Trautwein, A. X.; Winkler, H.; Hendrickson, D. N. [Tetrakis(2-pyridylmethyl)ethylenediamine]iron(II) Perchlorate, the First Rapidly Interconverting Ferrous Spin-crossover Complex. *J. Am. Chem. Soc.* **1990**, 112, 6814–6827.
- (13) Lennartson, A.; McKenzie, C. J. An iron(III) Iodosylbenzene Complex: a Masked Non-heme Fe(V)O. *Angew. Chem. Int. Ed. Engl.* **2012**, 51, 6767–6770.
- (14) Hazell, A.; McKenzie, C. J.; Nielsen, L. P.; Schindler, S.; Weitzer, M. Mononuclear Non-heme Iron(III) Peroxide Complexes: Syntheses, Characterisation, Mass Spectrometric and Kinetic Studies. *J. Chem. Soc., Dalton Trans.* **2002**, 310.
- (15) Jensen, K. B.; McKenzie, C. J.; Nielsen, L. P.; Zacho Pedersen, J.; Svendsen, H. M. Deprotonation of Low-spin Mononuclear iron(III)–hydroperoxide Complexes Give Transient Blue Species Assigned to High-spin iron(III)–peroxide Complexes. *Chem. Commun.* **1999**, 1313–1314.
